# Supplementary material for: Impact of Sex in Left Atrial Indices for Prognosis of Heart Failure with Preserved Ejection Fraction
Source: MDPI journal article supplement (doi:10.3390/jcm11195910), 2022-10-07
Supplement: s1 [file s1]

**Table S1.** Differences in clinical characteristics before discharge and event rates during the first year in patients with low and high left atrial volume index before enrollment.

|                                 | Left atrial volume index |                       | <i>P value</i> |
|---------------------------------|--------------------------|-----------------------|----------------|
|                                 | ≤43 mL/m <sup>2</sup>    | >43 mL/m <sup>2</sup> |                |
| Age, years                      | 80 ± 10                  | 82 ± 8                | 0.001          |
| Men, %                          | 49                       | 41                    | 0.044          |
| Systolic blood pressure, mmHg   | 124 ± 19                 | 120 ± 19              | 0.011          |
| Diastolic blood pressure, mmHg  | 67 ± 12                  | 65 ± 12               | 0.055          |
| Heart rate, bpm                 | 70 ± 15                  | 70 ± 15               | 0.458          |
| Log (NT-proBNP)                 | 2.90 ± 0.54              | 3.15 ± 0.48           | <0.001         |
| eGFR, mL/min/1.73m <sup>2</sup> | 46.0 ± 20.4              | 40.9 ± 17.2           | <0.001         |
| Atrial fibrillation, %          | 29                       | 57                    | <0.001         |
| Coronary artery disease, %      | 16                       | 20                    | 0.412          |
| Diabetes mellitus, %            | 34                       | 33                    | 0.924          |
| Dyslipidaemia, %                | 37                       | 45                    | 0.035          |
| Hypertension, %                 | 84                       | 86                    | 0.303          |
| <i>Medications</i>              |                          |                       |                |
| Beta-blockers, %                | 47                       | 60                    | <0.001         |
| Calcium-channel blockers, %     | 53                       | 51                    | 0.697          |
| Diuretics, %                    | 77                       | 86                    | <0.001         |
| RAAS inhibitors, %              | 70                       | 76                    | 0.108          |
| Statins, %                      | 29                       | 35                    | 0.124          |
| <i>Re-admission for HF, %</i>   | 26                       | 38                    | <0.001         |

Values are mean ± standard deviation or percentage. eGFR, estimated glomerular filtration rate; HF, heart failure; NT-proBNP, N-terminal pro-brain natriuretic peptide; RAAS, renin-angiotensin-aldosterone system.

**Table S2.** Differences in echocardiographic data in patients with low and high left atrial volume index before discharge.

|                         | LAVI          |               | <i>P value</i> |
|-------------------------|---------------|---------------|----------------|
|                         | Low           | High          |                |
| LAD, mm                 | 39 ± 6        | 47 ± 8        | <0.001         |
| LAVI, mL/m <sup>2</sup> | 33 ± 7        | 69 ± 29       | <0.001         |
| SV/LAV                  | 0.98 ± 0.37   | 0.55 ± 0.26   | <0.001         |
| LVDs, mm                | 29 ± 6        | 30 ± 5        | <0.001         |
| LVDd, mm                | 45 ± 6        | 46 ± 6        | <0.001         |
| LVEF, %                 | 61.1 ± 7.7    | 60.2 ± 7.9    | 0.164          |
| LVMI, g/m <sup>2</sup>  | 100 ± 29      | 113 ± 38      | <0.001         |
| DcT of E wave, sec      | 0.22 ± 0.06   | 0.21 ± 0.07   | 0.354          |
| E/e'                    | 13.1 ± 5.5    | 14.2 ± 6.1    | 0.017          |
| Ed/Ea                   | 0.120 ± 0.055 | 0.133 ± 0.059 | 0.003          |

Values are mean ± standard deviation. DcT, deceleration time; E, early transmitral flow velocity; e', onset of early diastolic mitral annular velocity; Ea, arterial elastance; Ed diastolic elastance; LAD, left atrial diameter; LAV, left atrial volume; LAVI, left atrial volume index; LVDs, left ventricular end-systolic dimension; LVDd, left ventricular end-diastolic dimension; LVEF, left ventricular ejection fraction; LVMI, left ventricular mass index; SV, stroke volume.

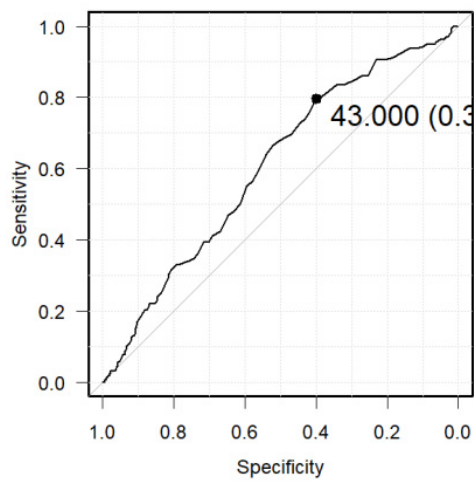

LVI: AUC 0.606 (95% CI 0.558 - 0.654)

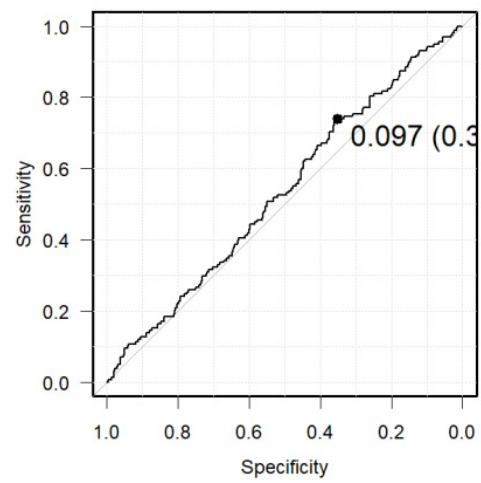

Ed/Ea: AUC 0.533 (95%CI 0.483 - 0.582)

**Figure S1:** Area under the curve (AUC) calculated by receiver operating characteristic curve analysis in all patients with heart failure with preserved ejection fraction.
